# Supplementary material
Source: MDPI journal article supplement (https://www.mdpi.com/2073-4395/12/5/1071)
Supplement: s1 [file s1]

**Supplementary Table S1**Geographical origin of *D. sanguinalis* populations (2014).

| Population | Location |           |           | Coordinate              |
|------------|----------|-----------|-----------|-------------------------|
|            | Province | County    | Village   |                         |
| 14HN2      | Hunan    | Anxiang   | Chejiapu  | N29°29'33", E112°11'25" |
| 14HN3      | Hunan    | Taoyuan   | Chenbei   | N28°55'14", E111°29'37" |
| 14HN4      | Hunan    | Furong    | Dongan    | N28°11'06", E113°04'36" |
| 14HN5      | Hunan    | Hanshou   | Longdaji  | N29°00'43", E111°59'32" |
| 14HN6      | Hunan    | Xiangying | Hehu      | N28°43'56", E112°45'31" |
| 14HN7      | Hunan    | Dingcheng | Haozhou   | N29°02'02", E111°50'57" |
| 14HN8      | Hunan    | Linli     | Bamao     | N29°37'41", E111°33'46" |
| 14HN9      | Hunan    | Wangcheng | Xinkang   | N28°24'38", E112°47'48" |
| 14HN10     | Hunan    | Yuanjiang | Siming    | N29°02'34", E112°24'11" |
| 14HN11     | Hunan    | Nan       | Niuchang  | N29°20'57", E112°26'17" |
| 14HN12     | Hunan    | Datonghu  | Hewan     | N29°10'11", E112°37'35" |
| 14HN13     | Hunan    | Li        | Hongxing  | N29°38'04", E111°56'13" |
| 14JX1      | Jiangxi  | Jiujiang  | Maoqiao   | N29°33'18", E115°52'02" |
| 14HEN1     | Henan    | Liangyuan | Wanglou   | N34°41'33", E115°53'42" |
| 14HEN2     | Henan    | Luyi      | Zhangqiao | N34°02'03", E115°32'52" |
| 14HB1      | Hubei    | Tianmen   | Yuxin     | N30°38'44", E112°57'14" |
| 14HB2      | Hubei    | Tianmen   | Huangtan  | N30°40'02", E113°03'50" |
| 14SX1      | Shanxi   | Yangling  | Youfeng   | N34°28'53", E108°06'37" |
| 14XJ1      | Xinjiang | Kashi     | Shufu     | N39°20'49", E75°52'29"  |
| 14HEB1     | Hebei    | Cangzhou  | Nanpi     | N37°59'10", E116°49'14" |
| 14HEB2     | Hebei    | Handan    | Quzhou    | N36°47'02", E115°00'06" |
| 14AH1      | Anhui    | Hanshan   | Dama      | N31°47'49", E118°08'06" |
| 14HN1(S)   | Hunan    | Li        | Xinglong  | N29°37'24", E111°45'36" |

**Supplementary Table S2**Geographical origin of *D. sanguinalis* populations (2015).

| Population | Location |           |             | Coordinate              |
|------------|----------|-----------|-------------|-------------------------|
|            | Province | County    | Village     |                         |
| 15HN1      | Hunan    | Li        | Xiaodukou   | N29°36'54", E111°51'12" |
| 15HN2      | Hunan    | Li        | Xinmiao     | N29°38'07", E111°56'21" |
| 15HN3      | Hunan    | Li        | Zhanggong   | N29°35'12", E111°54'33" |
| 15HN5      | Hunan    | Anxiang   | Huaxinnan   | N29°40'59", E112°20'38" |
| 15HN6      | Hunan    | Anxiang   | Fuchangqiao | N29°24'17", E112°11'56" |
| 15HN8      | Hunan    | Taoyuan   | Gonglu      | N29°02'42", E111°49'24" |
| 15HN9      | Hunan    | Nan       | Niuchang    | N29°35'59", E112°43'33" |
| 15HN10     | Hunan    | Nan       | Sanguang    | N29°19'54", E112°53'46" |
| 15HN12     | Hunan    | Yuanjiang | Fuming      | N29°40'51", E112°36'46" |
| 15HEN1     | Henan    | Tuocheng  | Laowangji   | N34°01'11", E115°18'03" |
| 15HEN2     | Henan    | Liangyuan | Yangzhuang  | N34°23'16", E115°46'18" |
| 15JX1      | Jiangxi  | Pengze    | Furong      | N29°52'04", E116°29'13" |
| 15JX2      | Jiangxi  | Pengze    | Jianshanliu | N29°51'44", E116°37'21" |

|          |         |         |          |                         |
|----------|---------|---------|----------|-------------------------|
| 15JX3    | Jiangxi | Pengze  | Wulian   | N29°50'37", E116°29'19" |
| 15JX4    | Jiangxi | Hukou   | Junqiao  | N29°40'25", E116°17'40" |
| 15JX7    | Jiangxi | Xingan  | Zaoshi   | N27°47'55", E115°43'06" |
| 15HB1    | Hubei   | Tianmen | Xiaoban  | N30°35'48", E113°10'54" |
| 15HEB2   | Hebei   | Quzhou  | Huaiqiao | N36°46'30", E115°01'16" |
| 14HN1(S) | Hunan   | Li      | Xinglong | N29°37'24", E111°45'36" |

**Supplementary Table S3**

Geographical origin of *D. sanguinalis* populations (2016).

| Population | Location |          |             | Coordinate              |
|------------|----------|----------|-------------|-------------------------|
|            | Province | County   | Village     |                         |
| 16HN2      | Hunan    | Henshan  | Beiwangqiao | N27°14'46", E112°51'31" |
| 16HN3      | Hunan    | Taoyuan  | Fengshu     | N29°00'52", E111°29'51" |
| 16HN4      | Hunan    | Anxiang  | Huananxin   | N29°23'30", E112°12'13" |
| 16HN5      | Hunan    | Huarong  | Guanyan     | N29°32'10", E112°42'37" |
| 16JX1      | Jiangxi  | Pengze   | Jinxing     | N30°00'04", E116°38'14" |
| 16JX4      | Jiangxi  | Jiujiang | Sunjiaao    | N29°33'28", E115°46'05" |
| 16HEN1     | Henan    | Xinxiang | Muye        | N35°19'15", E113°59'07" |
| 16HEB1     | Hebei    | Wei      | Xishayin    | N37°05'51", E115°08'30" |
| 16HEB4     | Hebei    | Quzhou   | Huaiqiao    | N36°46'58", E115°02'48" |
| 16HEB5     | Hebei    | Qiu      | Hengzhuang  | N36°47'44", E115°09'32" |
| 16HEB6     | Hebei    | Hengshui | Xiaoxiyein  | N37°44'54", E115°43'43" |
| 16HEB7     | Hebei    | Hengshui | Hujiachi    | N37°53'43", E115°42'14" |
| 14HN1(S)   | Hunan    | Li       | Xinglong    | N29°37'24", E111°45'36" |

**Supplementary Table S4**

Geographical origin of *D. sanguinalis* populations (2017).

| Population | Location |         |             | Coordinate              |
|------------|----------|---------|-------------|-------------------------|
|            | Province | County  | Village     |                         |
| 17HEB1     | Hebei    | Handan  | Changzhuang | N36°31'40", E114°47'02" |
| 17HEB2     | Hebei    | Xingtai | Zhu         | N36°52'43", E114°29'32" |
| 17HEB3     | Hebei    | Xingtai | Han         | N37°04'59", E114°38'33" |
| 17HEB4     | Hebei    | Xingtai | Xisuncai    | N37°07'59", E114°36'15" |
| 17HEB5     | Hebei    | Xingtai | Nanyang     | N37°29'06", E114°43'58" |
| 17HEB6     | Hebei    | Xingtai | Beizhang    | N37°31'40", E114°44'21" |
| 17HEB7     | Hebei    | Xingtai | Xing        | N37°33'26", E114°44'26" |
| 17HEB8     | Hebei    | Xingtai | Xima        | N37°33'57", E114°44'39" |
| 17HEB9     | Hebei    | Xingtai | Nansu       | N37°35'41", E114°46'34" |
| 17JX1      | Jiangxi  | Pengze  | Dingshan    | N29°49'45", E116°25'07" |
| 17JX2      | Jiangxi  | Hukou   | Liusi       | N29°47'07", E116°23'44" |
| 17JX3      | Jiangxi  | Hukou   | Baishu      | N29°43'51", E116°26'58" |
| 14HN1(S)   | Hunan    | Li      | Xinglong    | N29°37'24", E111°45'36" |
